# Supplementary material for: What makes music memorable? Relationships between acoustic musical features and music-evoked emotions and memories in older adults
Source: PLOS journal article supplement (doi:10.1371/journal.pone.0251692), 2021-05-14
Supplement: S4 (10.1371/journal.pone.0251692.s004) [file journal.pone.0251692.s004]

**S4 Table.** Bivariate correlations, regression coefficients, and p-values of Familiarity mediation models for each emotion variable.

| Variables           | Familiarity | Emotional intensity | $\beta$ | p       | R <sup>2</sup> | F (p)          |
|---------------------|-------------|---------------------|---------|---------|----------------|----------------|
| Emotional intensity | .71         |                     | 0.182   | < .0001 |                |                |
| Pulse strength      | -.56        | -.42                | -0.062  | < .0001 | .621           | 55.35 (<.0001) |
| Brightness          | -.31        | -.28                | -0.030  | .003    |                |                |
| Low-mid             | -.21        | -.27                | -0.014  | .16     |                |                |
|                     | Familiarity | Valence             | $\beta$ | p       | R <sup>2</sup> | F (p)          |
| Valence             | .56         |                     | 0.126   | < .0001 |                |                |
| Pulse strength      | -.56        | -.33                | -0.080  | < .0001 | .530           | 38.03 (<.0001) |
| Brightness          | -.31        | -.27                | -0.040  | .0003   |                |                |
| Low-mid             | -.21        | -.27                | -0.023  | .04     |                |                |
|                     | Familiarity | Arousal             | $\beta$ | p       | R <sup>2</sup> | F (p)          |
| Arousal             | .47         |                     | 0.188   | < .0001 |                |                |
| Pulse strength      | -.56        | -.25                | -0.085  | < .0001 | .557           | 42.47 (<.0001) |
| Brightness          | -.31        | -.04                | -0.054  | < .0001 |                |                |
| Low-mid             | -.21        | -.01                | -0.038  | .0002   |                |                |

$\beta$  = unstandardized regression coefficient of a single predictor in multiple regression model, after controlling for other variables, p = p-value of a single variable, R<sup>2</sup> = coefficient of determination of the model, F (p) = F-value of the model (p-value of the model in the brackets). Degrees of freedom for all models are 4 and 135.
